# Supplementary material for: Y-chromosome phylogeographic analysis of the Greek-Cypriot population reveals elements consistent with Neolithic and Bronze Age settlements
Source: PubMed Central journal article supplement (PMC4750176; doi:10.1186/s13323-016-0032-8), 2016-02-11

Figure S5

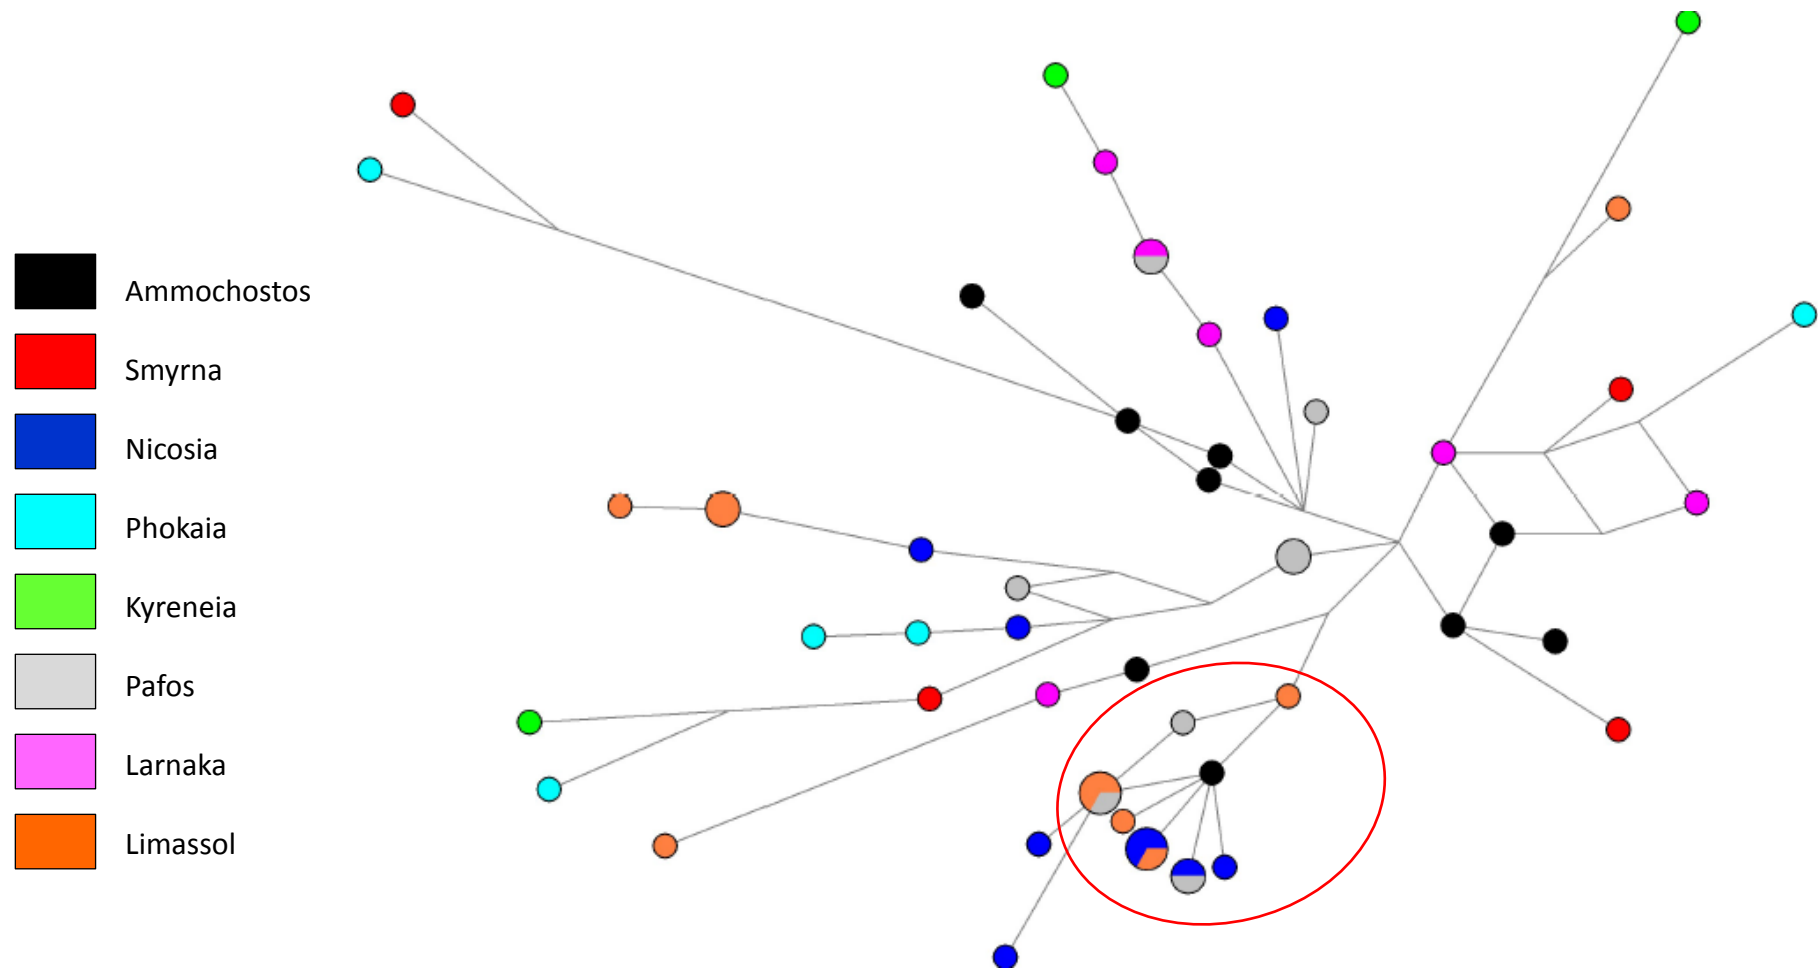

Supplement: 13323_2016_32_MOESM10_ESM.pdf [file 13323_2016_32_MOESM10_ESM.pdf]
